# Supplementary material
Source: Springer Nature journal article supplement (https://www.springermedizin.de/resource/supplementary/12906_2006_104_MOESM4_ESM.pdf/9524028)

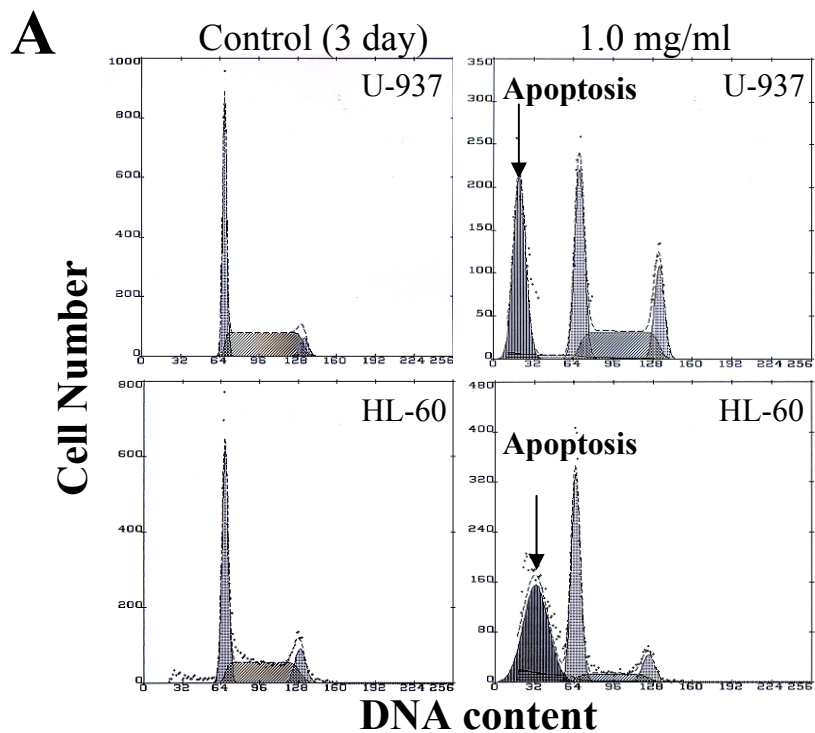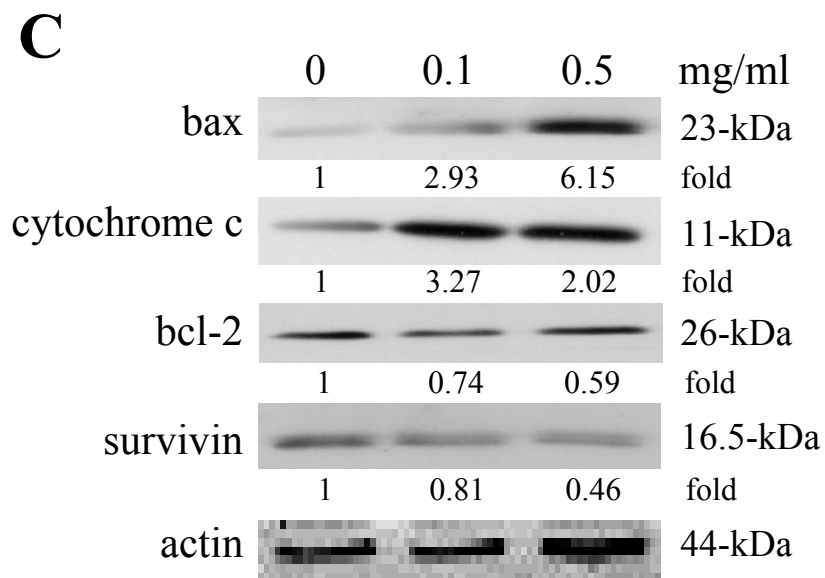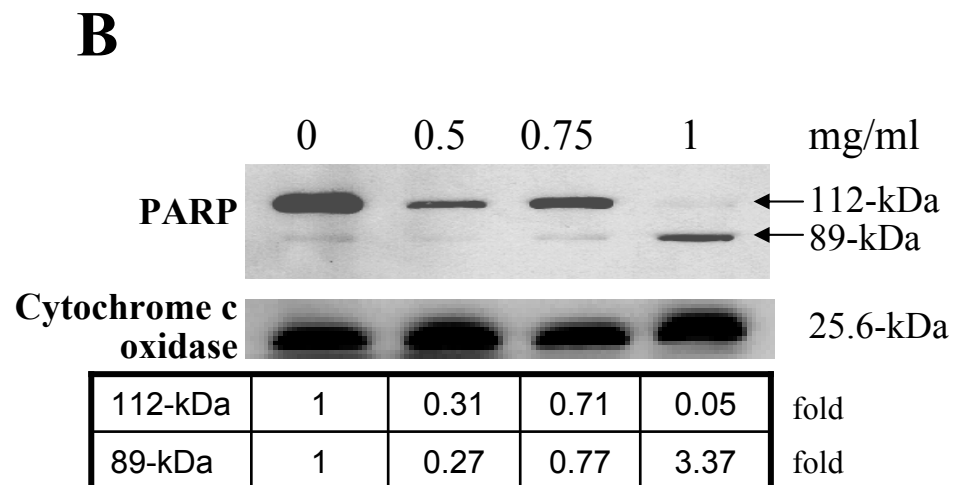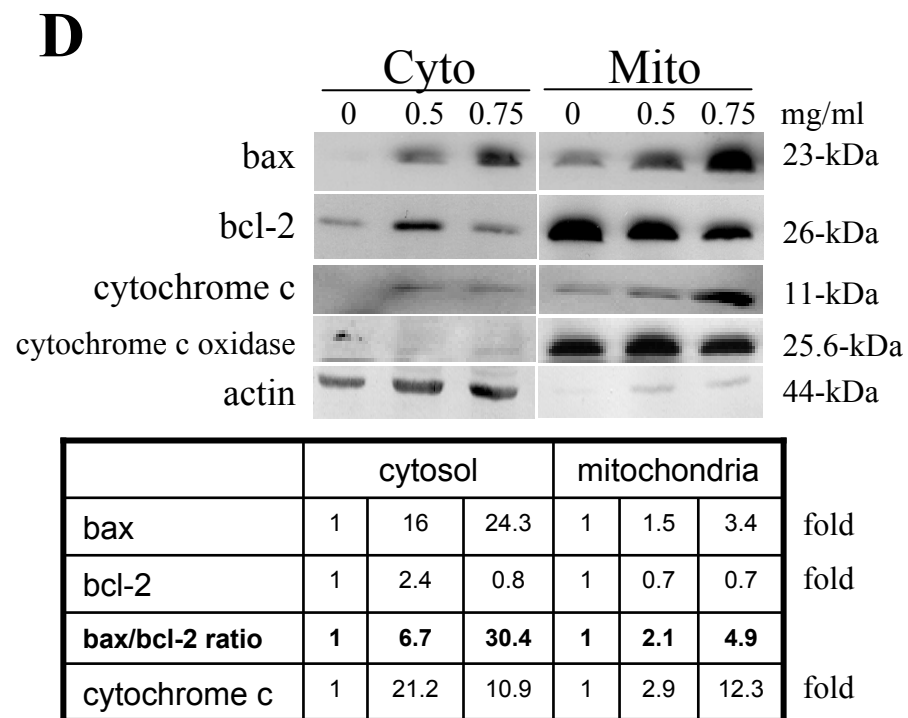

Supplement: MOESM4 [file 9524028]
